# Supplementary material for: Phenotypic Screen with TSC-Deficient Neurons Reveals Heat-Shock Machinery as a Druggable Pathway for mTORC1 and Reduced Cilia
Source: PubMed Central journal article supplement — Cell Rep. Author manuscript; Available in PMC 2020 Jul 25. (PMC7381997; doi:10.1016/j.celrep.2020.107780), 2020-06-23
Supplement: NIHMS1607413-supplement-1.pdf [file NIHMS1607413-supplement-1.pdf]

**Supplemental Information**

**Phenotypic Screen with TSC-Deficient Neurons**

**Reveals Heat-Shock Machinery as a Druggable**

**Pathway for mTORC1 and Reduced Cilia**

**Alessia Di Nardo, Isadora Lenoël, Kellen D. Winden, Alina Rühmkorf, Meera E. Modi, Lee Barrett, Ebru Ercan-Herbst, Pooja Venugopal, Robert Behne, Carla A.M. Lopes, Robin J. Kleiman, Mónica Bettencourt-Dias, and Mustafa Sahin**

**Figure S1**

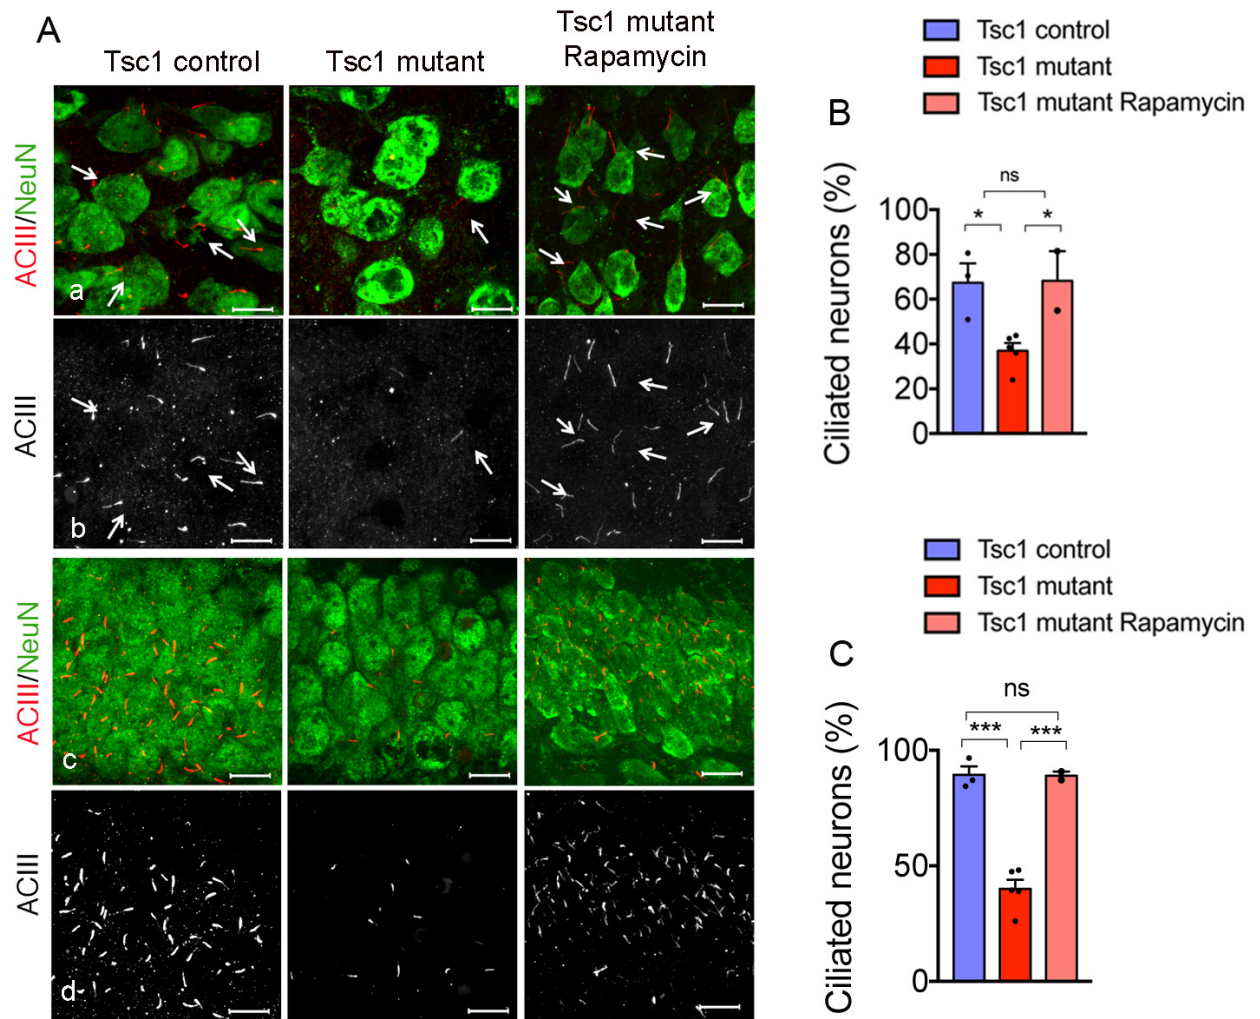

**Figure S1. *Tsc1* mutant mice have reduced ciliation in the cortex and in the dentate gyrus. Related to Figure 1.**

(A) Representative confocal images from the cortex (a-b) and the dentate gyrus (c-d) of vehicle-treated *Tsc1* control ( $n=3$ ), vehicle-treated *Tsc1* mutant ( $n=5$ ), and rapamycin-treated *Tsc1* mutant ( $n=2$ ), stained with the neuronal marker, NeuN (in green in a and c) and with the cilia marker ACIII (in red in a and c; in greyscale in b and d). White arrows indicate cilia. Quantification of the percentage of ciliated neurons in the cortex (B) and in the dentate gyrus (C) (700 neurons/mouse, one-way ANOVA with Tukey's *post hoc* test,  $*p<0.05$ ). Bars represent mean  $\pm$  SEM. Scale bar is 10 $\mu$ m.

**Figure S2**

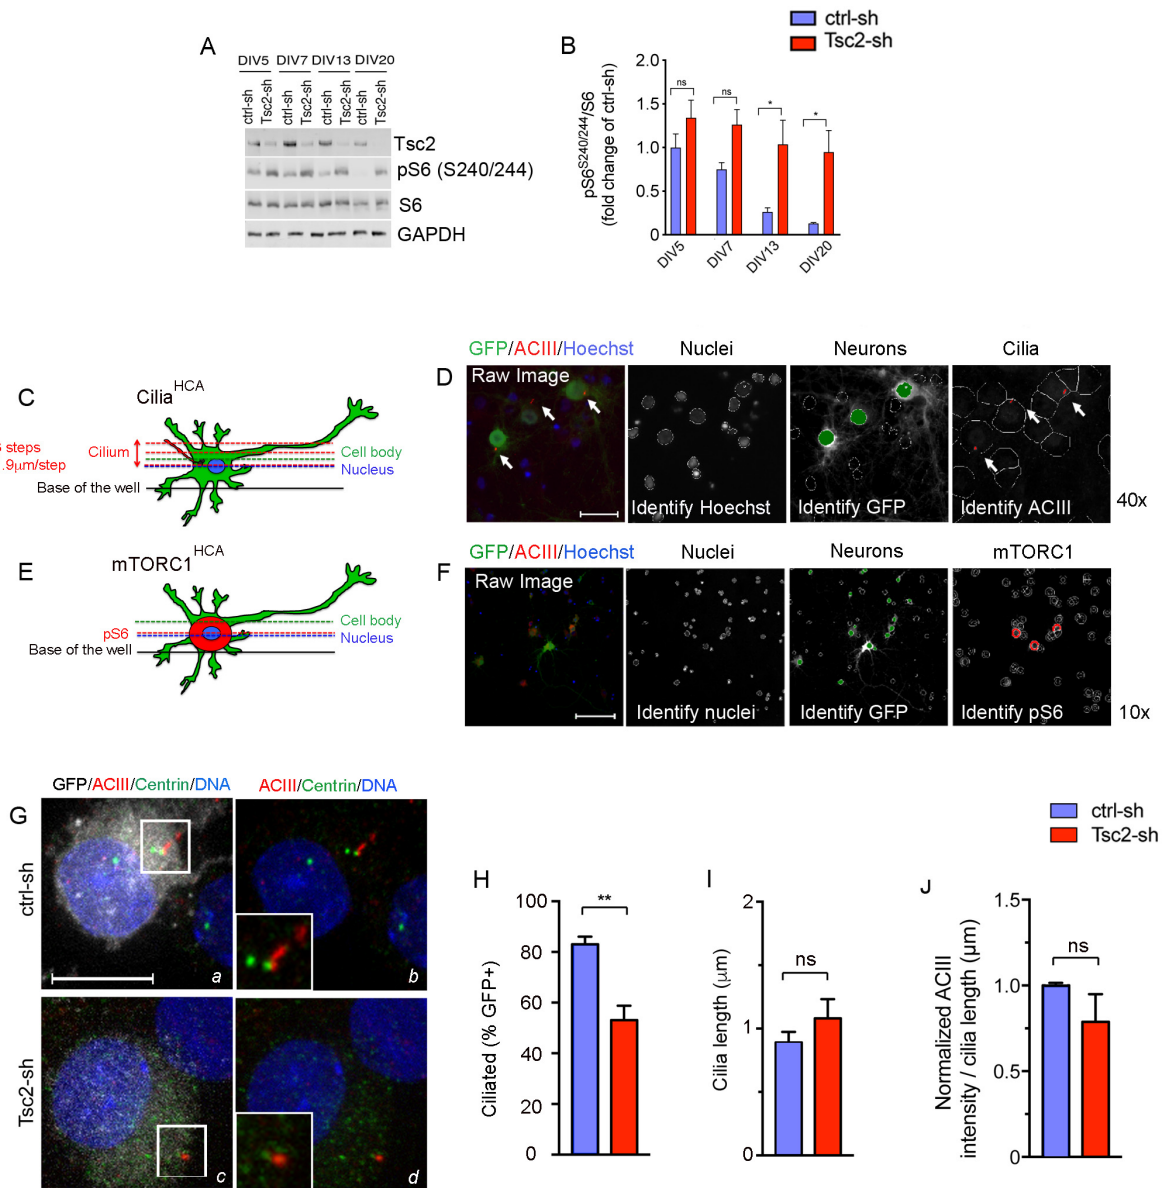

**Figure S2. *Tsc2* gene knockdown in hippocampal neurons results in reduced ciliation by high content imaging and manual confocal microscopy. Related to Figure 2.**

(A) Representative western blot of protein lysates from ctrl-sh, and Tsc2-sh neurons to monitor Tsc2 and S6 phosphorylation in a time course experiment at DIV5, 7, 13, 20. (B) Quantification of pS6 (n=4). Western blot data were normalized using GAPDH as loading control. Data are expressed as fold changes of vehicle-treated ctrl-sh neurons (Mann-Whitney Test,  $*p < 0.05$ ). Error bars indicate  $\pm$  SEM. (C-F) Image-based high-content assays for cilia and mTORC1 using the Arrayscan XTi. Schematic representation of focal planes and object identification used for the cilia<sup>HCA</sup> (C-D) and the mTORC1<sup>HCA</sup> (E-F). Raw images of hippocampal neurons transduced with GFP-tagged lentivirus show nuclei (Hoechst staining in blue), infected neurons (GFP staining in green), cilia and mTORC1 activity in red [ACIII staining (D) and pS6 staining (F) respectively]. Image acquisition for the cilia<sup>HCA</sup> and the mTORC1<sup>HCA</sup> was performed with respectively a 40x (scale bar is 25 μm) and a 10x (scale bar is 100 μm) objective. White masks show the region of interest (ROI) for object identification. (G) Representative images of cilia imaging in ctrl-sh and Tsc2-sh neurons using confocal microscopy. Neurons at DIV13 were stained with GFP (in grey in *a* and *c*), ACIII (in red in *a-d*), centrin (in green in *a-d*) and DAPI (in blue in *a-d*). Images on the left (*a* and *c*) include GFP staining to show the LV-transduced neurons and a white box indicating the regions enlarged for cilia and centrin staining magnified in the zoom (in *b* and *d*). Scale bar is 10 μm. (H) Quantification of the percentage of GFP<sup>+</sup> neurons with cilia. Bars represent mean  $\pm$  SEM (n=3, 88-100 GFP<sup>+</sup> neurons/exp; unpaired t-test,  $**p < 0.01$ ). (I) Cilia length. Bars represent mean  $\pm$  SEM (unpaired t-test, ns, non-significant). (J) ACIII intensity. Bars represent mean  $\pm$  SEM (unpaired t-test, ns, non-significant).

**Figure S3**

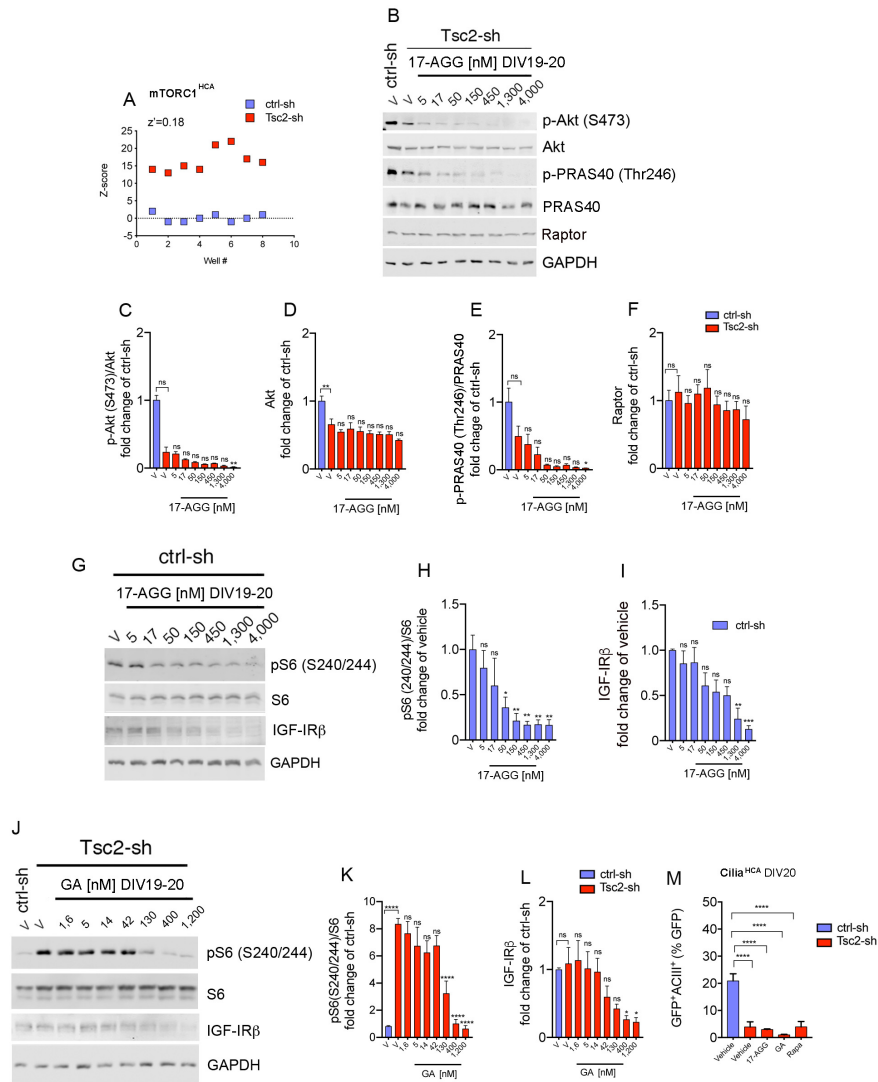

**Figure S3. Robustness of mTORC1<sup>HCA</sup> and effect of the hits identified in the screen on the mTORC1 pathway and on ciliation between DIV19-20. Related to Figure 3.**

(A) mTORC1<sup>HCA</sup> quality control by Z-scores calculated as the absolute deviation of GFP<sup>+</sup> pS6<sup>+</sup> neurons between positive (ctrl-sh neurons) and negative (Tsc2-sh) controls at DIV20 (n=8 wells/condition, Z'=0.18). (B) Western blot of protein lysates from ctrl-sh and Tsc2-sh treated with vehicle or with 17-AGG dose curve for 24hrs between DIV19-20. Quantification of p-Akt (Ser473) (C), Akt (D), p-PRAS40 (Thr246) (E), and Raptor (F). Western blot data were normalized using GAPDH as loading control. Data are fold changes of ctrl-sh neurons and are quantified relative to vehicle-treated Tsc2-sh neurons (n=4 experiment/condition). Kruskal-Wallis test followed by the Dunn's multiple comparison test \**p*<0.05, \*\**p*<0.01 (C, E), and one-way ANOVA with Dunnett's multiple comparison test \*\**p*<0.01 ns=not significant (D, F). (G) Western blot of protein lysates from ctrl-sh treated with vehicle or with 17-AGG dose curve. Quantification of pS6 (H), and IGF-IRβ (I). Western blot data were normalized using GAPDH as loading control. Data are fold changes of vehicle-treated ctrl-sh neurons (n=3-4 experiment/condition, one-way ANOVA with Dunnett's multiple comparison test, \**p*<0.05, \*\**p*<0.01, \*\*\**p*<0.001). (J) Western blot of protein lysates from ctrl-sh and Tsc2-sh treated with vehicle or with GA dose curve. Quantification of pS6 (K, n=3), and IGF-IRβ (L, n=4). Western blot data were normalized using GAPDH as loading control. Data are fold changes of ctrl-sh neurons and are quantified relative to vehicle-treated Tsc2-sh neurons (One-way ANOVA with Dunnett's multiple comparison test, \**p*<0.05, \*\*\**p*<0.0001). Error bars indicate ± SEM. (M) Quantification of ciliation using the cilia<sup>HCA</sup> in ctrl-sh and in Tsc2-sh neurons treated with vehicle, 8.5μM 17-AGG, 9μM geldanamycin (GA) and 5.5μM rapamycin for 24hrs at DIV20 (n=2-4 wells/condition, one-way ANOVA with Sidak's multiple comparison test, \*\*\**p*<0.0005).

**Figure S4**

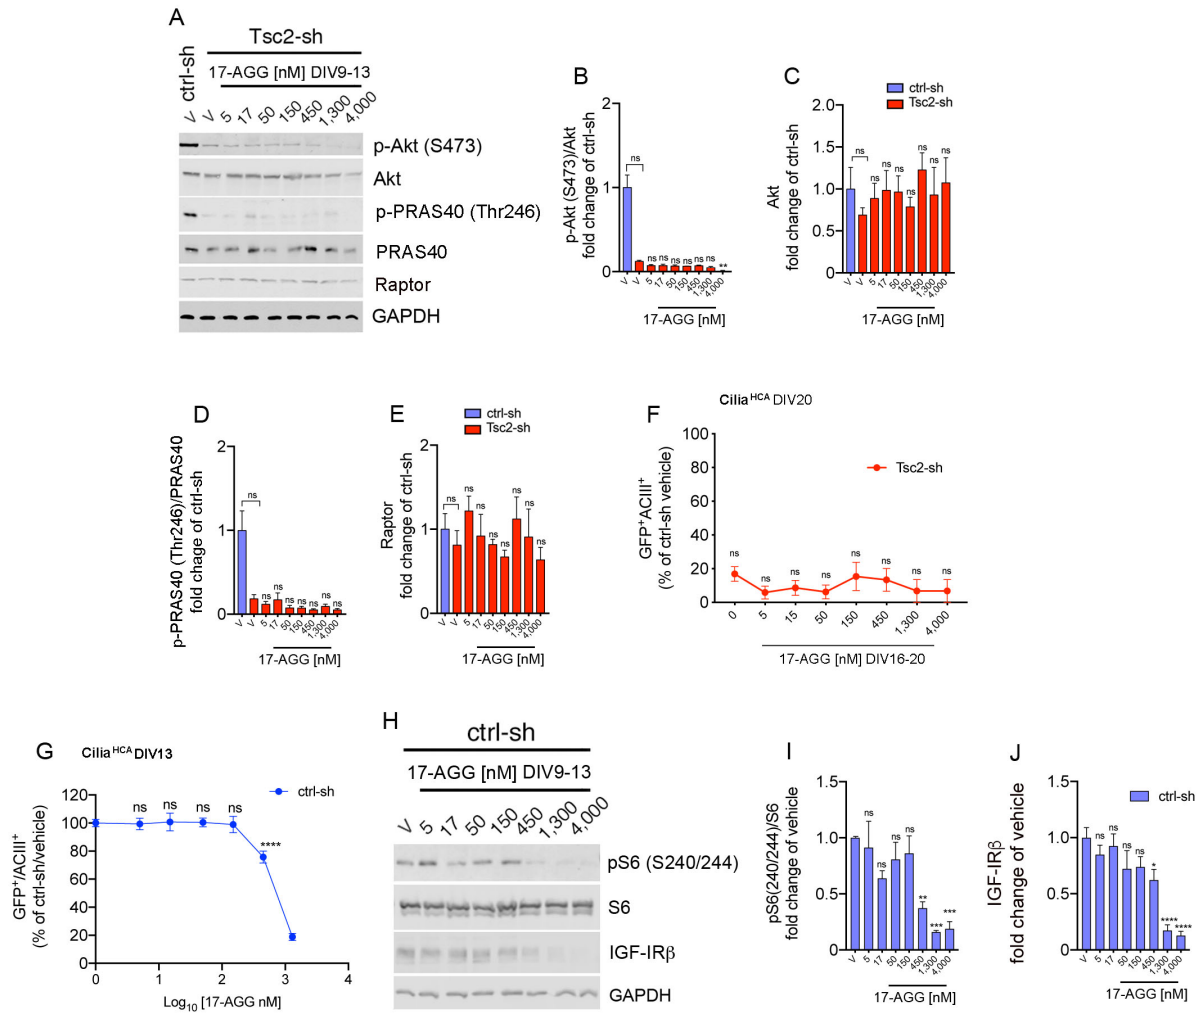

**Figure S4. Effect of Hsp90 inhibition with 17-AGG on PI3K/Akt signaling in Tsc2-knockdown neuronal cultures at DIV13. Related to Figure 4.**

(A) Western blot of protein lysates from ctrl-sh and Tsc2-sh treated with vehicle or with 17-AGG dose curve. Quantification of p-Akt at S473 (B), Akt (C), p-PRAS at Thr246 (D), and Raptor (E). Western blot data were normalized using GAPDH as loading control. Data are fold changes of ctrl-sh neurons and are quantified relative to vehicle-treated Tsc2-sh neurons (n=4 experiment/condition, Kruskal-Wallis test followed by Dunn's multiple comparison test  $**p<0.01$  (B, D) and one-way ANOVA with Dunnett's multiple comparison test (C, E), ns=not significant. Error bars indicate  $\pm$  SEM. (F) Quantification of ciliation using the cilia<sup>HCA</sup> in Tsc2-sh neurons treated with a four-day 17-AGG dose curve between DIV16-20 with assay endpoint at DIV20. Data quantification was done relative to vehicle-treated Tsc2-sh neurons (n=8-16 biological replica/condition, one-way ANOVA with Dunnett's multiple comparison test, not significant). (G) Quantification of ciliation using the cilia<sup>HCA</sup> in ctrl-sh neurons treated with a four-day 17-AGG dose curve between DIV9-13 with assay endpoint at DIV13. Data were quantified relative to vehicle-treated ctrl-sh neurons (n=16-32 biological replica/condition, one-way ANOVA with Dunnett's multiple-comparison test,  $****p<0.0001$ ) and are expressed as average  $\pm$  SEM. (H) Western blot of protein lysates from ctrl-sh treated with vehicle or with 17-AGG dose curve. Quantification of pS6 (I), and IGF-IRβ (J). Western blot data were normalized using GAPDH as loading control. Data are fold changes of vehicle-treated ctrl-sh neurons (n=4-8 experiment/condition, one-way ANOVA with Dunnett's multiple comparison test,  $***p<0.001$ ,  $****p<0.0001$ ). Error bars indicate  $\pm$  SEM.
